# Supplementary material for: Cube-like Ag/AgCl fabricated via a photoirradiation method and its substantially boosted plasmonic photocatalytic reactivity by an oxidation–chloridization treatment
Source: Royal Society of Chemistry journal article supplement (doi:10.1039/c6ra01640e), 2016-01-01
Supplement: c6ra01640e1.pdf [file c6ra01640e1.pdf]

## Electronic Supplementary Information

### Cube-like Ag/AgCl fabricated *via* a photoirradiation method and their substantially boosted plasmonic photocatalytic reactivity by an oxidation–chloridization treatment

Dan Xiao,<sup>a</sup> Tiesheng Li,<sup>b</sup> Yanping Wang,<sup>a</sup> Penglei Chen,<sup>\*a</sup> Guangwei Geng<sup>a</sup> and Minghua Liu<sup>a</sup>

<sup>a</sup>Beijing National Laboratory for Molecular Science, Institute of Chemistry, Chinese Academy of Sciences, No. 2 Zhongguancun Beiyijie, Beijing 100190, People's Republic of China. E-mail: [chenpl@iccas.ac.cn](mailto:chenpl@iccas.ac.cn)

<sup>b</sup>College of Chemistry and Molecular Engineering, Zhengzhou University, 100 Science Road, Henan, Zhengzhou 450001, People's Republic of China.

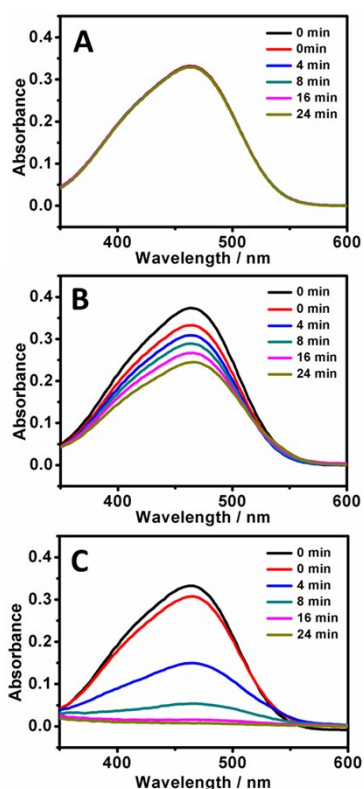

**Fig. S1** The typical real-time absorption spectra of MO molecules during the photodegradation process over our Ag/AgCl-based plasmonic structures under visible-light irradiations. Panel A: a blank experiment, wherein no catalyst is used. Panel B: the pristine Ag/AgCl structures are used as the photocatalysts. Panel C: the oxidation–chloridization–treated Ag/AgCl species are employed as the photocatalysts. The black and red curves marked as 0 min are the absorption spectra detected from the original MO solution before (black) and after (red) the dark adsorption experiment, respectively.

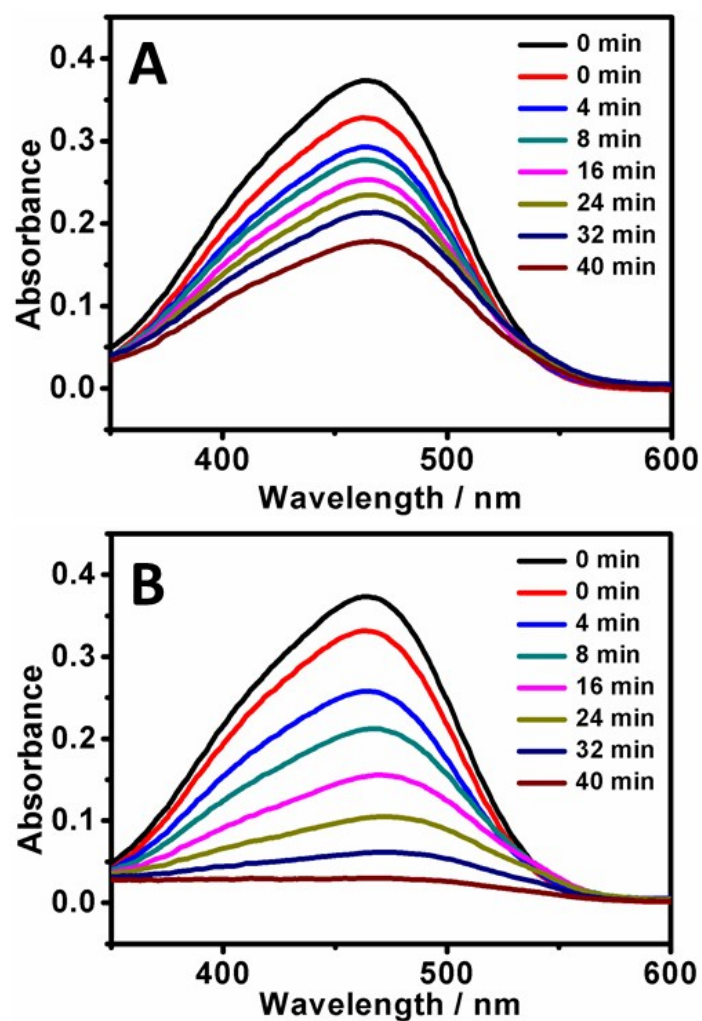

**Fig. S2** The typical real-time absorption spectra of MO molecules during the photodegradation process over our Ag/AgCl-based plasmonic structures under UV-light ( $\lambda = 365$  nm) irradiations. Panel A: the pristine Ag/AgCl structures are used as the photocatalysts. Panel B: the oxidation-chloridization-treated Ag/AgCl species are employed as the photocatalysts. The black and red curves marked as 0 min are the absorption spectra detected from the original MO solution before (black) and after (red) the dark adsorption experiment, respectively.

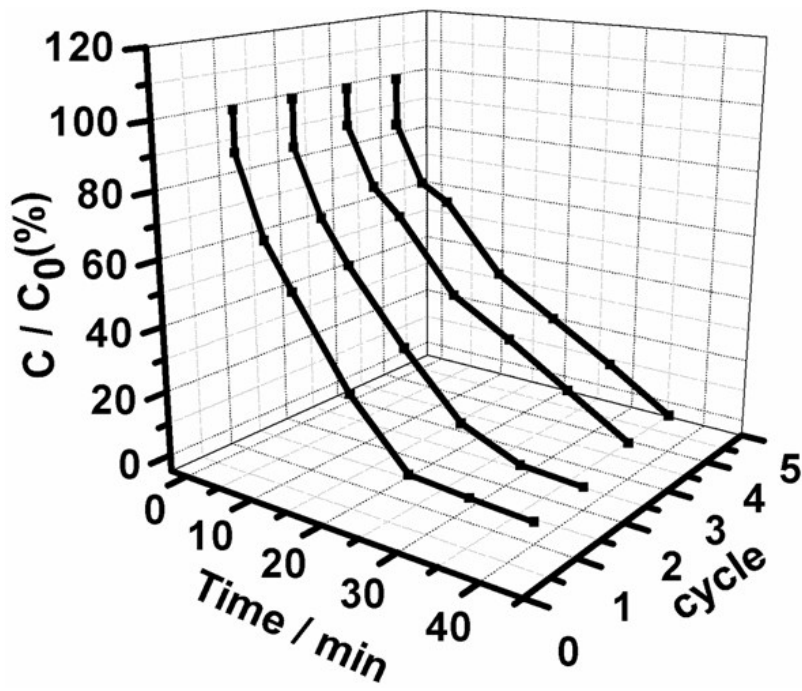

**Fig. S3** The consecutive cycling photocatalytic behaviors of the oxidation–chloridization–treated Ag/AgCl structures towards the photodegradation of MO molecules under visible–light irradiation.
